# Supplementary material for: First North American fossil monkey and early Miocene tropical biotic interchange
Source: Springer Nature journal article supplement (doi:10.1038/nature17415), 2016-04-19
Supplement: 41586_2016_BFnature17415_MOESM23_ESM.pdf [file 41586_2016_BFnature17415_MOESM23_ESM.pdf]

**First North American fossil monkey and early Miocene tropical biotic interchange**

Jonathan I. Bloch, Emily D. Woodruff, Aaron R. Wood, Aldo F. Rincon, Arianna R. Harrington, Gary S. Morgan, David A. Foster, Camilo Montes, Carlos A. Jaramillo, Nathan A. Jud, Douglas S. Jones, and Bruce J. MacFadden

**Supplementary Methods****Methods: Comparative Morphology**

Comparisons were done within the morphological framework outlined and discussed in Kay et al. (2008)<sup>31</sup> and Kay (2015)<sup>1</sup> with reference to the literature for fossil taxa as follows (see also Kay, 2015<sup>1</sup>, Table 1 and references therein): *Perupithecus*, ?Late Eocene, Peru<sup>16</sup>; *Branisella*, Late Oligocene, Bolivia<sup>32,33</sup>; *Chilecebus*, early Miocene, Chili<sup>34</sup>; *Tremacebus*, early Miocene, Argentina<sup>35,36</sup>; *Dolichocebus*, early Miocene, Argentina<sup>31</sup>; *Mazzonicebus*, early Miocene, Argentina<sup>37</sup>; *Soriacebus*, early Miocene, Argentina<sup>38</sup>; *Carlocebus*, early Miocene, Argentina<sup>39</sup>; *Homunculus*, late early Miocene, Argentina<sup>40-42</sup>; *Proteropithecina*, middle Miocene, Argentina<sup>43</sup>; *Nuciraptor*, middle Miocene, Colombia<sup>44</sup>; *Mohanamico*, middle Miocene, Colombia<sup>45</sup>; *Cebupithecina*, middle Miocene, Colombia<sup>46</sup>; *Stirtonia*, middle Miocene, Colombia<sup>47</sup>; *Neosaimiri*, middle Miocene, Colombia<sup>48</sup>; *Patasola*, middle Miocene, Colombia<sup>49</sup>; *Lagonimico*, middle Miocene, Colombia<sup>50</sup>; *Micodon*, Middle Miocene, Colombia<sup>49,51</sup>; *Miocallicebus*, middle Miocene, Colombia<sup>52</sup>; *Acrecebus*, late Miocene, Brazil<sup>53</sup>; *Paralouatta*, ?early Miocene and Quaternary, Cuba<sup>54-56</sup>; *Xenothrix*, Quaternary, Jamaica<sup>57,58</sup>; *Insulacebus*, Quaternary, Haiti<sup>23</sup>; *Antillothrix*, Quaternary, Dominican Republic<sup>59-62</sup>. Additional comparisons were made to specimens and casts of fossil and extant platyrrhines. Three-dimensional images of relevant fossil platyrrhines were reconstructed from micro CT scans (see Methods 3-D Data Acquisition).

**Methods: Phylogenetic Analysis of Morphological Data**

Three phylogenetic analyses were conducted to investigate the phylogenetic position of *Panamacebus*. All phylogenetic and divergence analyses were conducted using the resources of the High Performance Computing Center at the University of Florida.

*Panamacebus* was added to an existing morphological character matrix which was analyzed using the same parameters as the original analysis<sup>1</sup> with 177 ordered characters and all characters given a weight other than one (Supplementary Data 1). A second analysis employed a different constraint tree (Supplementary Data 2) derived from a recent molecular supermatrix<sup>21,22</sup>. This supermatrix contained 372 extant primate species and 61,199 nucleotides (including gaps), which we re-analyzed before using this topology as our new constraint (see description below). The second constraint tree differs from the constraint used in the original analysis<sup>1</sup> in two respects. First, *Aotus* is more closely related to *Saguinus* than it is to *Saimiri* and *Cebus*, and, second, *Cebuella* is absent from the molecular dataset, which is a result of *Cebuella* being synonymous with *Callithrix pygmaea*<sup>63,64</sup>. The third analysis was conducted using the character ordering and weighting scheme of Kay (2015)<sup>1</sup> but without any constraint.

Three additional iterations of the second phylogenetic analysis with *Panamacebus*, described above, were conducted to assess the impact of the character ordering and weighting scheme imposed by Kay (2015)<sup>1</sup> on the topology: 1) characters ordered but unweighted, 2) characters unordered but weighted, and 3) characters unordered and unweighted (Supplementary Data 1). These analyses were conducted using the first constraint tree<sup>1</sup>.

Each maximum parsimony analysis was conducted in PAUP v 4.0 beta<sup>65</sup> using a heuristic search with 1,000 random addition sequence replicates and tree-bisection-reconnection (TBR) branch swapping. Multi-state characters were treated as polymorphic. Bootstrapping was also performed with 1,000 bootstrap replicates analyzed with a heuristic search algorithm with three random-addition sequence replicates and TBR branch swapping. Trees resulting from all analyses (Supplementary Figs. 4-10) were rooted *a posteriori* with *Aegyptopithecus*, *Apidium*, *Catopithecus*, *Proteopithecus*, *Simonsius*, *Hylobates*, *Miopithecus*, and *Presbytis* and the out-group was set monophyletic to the in-group following Kay (2015)<sup>1</sup>.

### Methods: Phylogenetic Analysis of Molecular Data and Constraint Tree

A recent phylogenetic analysis of a molecular supermatrix compiled by Perelman et al. (2011)<sup>21</sup> and updated by Springer et al. (2012)<sup>20</sup> was used for the second constraint tree

and for the molecular dating analysis. The molecular sequence alignment was re-analyzed using maximum likelihood in RAxML version 7.3.2<sup>66</sup>. A rapid bootstrap analysis was conducted followed by a search for the most likely tree (-f a) under the general time reversible (GTR) plus gamma model of nucleotide evolution. The dataset was partitioned by gene segment, enabling RAxML to estimate the GTR model, empirical base frequencies, and the shape parameter ( $\alpha$ ) of the gamma distribution for each of the 79 partitions. Two iterations of this analysis were performed, each with 500 maximum likelihood inference replicates made from 500 distinct maximum parsimony starting trees. Each analysis resulted in a single “best” tree with the lowest maximum likelihood score obtained in the analysis. Both trees were rooted with Lagomorpha and compared by eye; these topologies from our replicate analyses were identical. The tree was modified appropriately for use as a constraint tree (Supplementary Data 2) for our phylogenetic analysis; any taxa that were not present in Kay’s (2015)<sup>1</sup> analysis were removed from the tree and species-level clades were collapsed to the genus level.

### Methods: Divergence Dating Recalibration Analyses

We modified the sequence alignment from Springer et al. (2012)<sup>20</sup> in Geneious v6.1.6 (Biomatters Ltd.) to decrease computational time required for this analysis and this reduced sequence alignment contained 190 taxa and 46,851 sites (Supplementary Data 3). We conducted two separate Bayesian Markov chain Monte Carlo (MCMC) analyses in BEAST v1.8<sup>67</sup>, the first using the Yule model<sup>68</sup>, a pure birth process, and the second using the birth-death model<sup>69</sup> of speciation. The BEAGLE library v2.1<sup>70</sup> was used in conjunction with BEAST to decrease computational time; each analysis took approximately 20 days to complete.

Input files for BEAST were generated in BEAUti v1.8<sup>67</sup>. Analyses were conducted under a lognormal relaxed molecular clock in which the rates along branches are uncorrelated. We used a GTR + gamma nucleotide substitution model with 4 rate categories and estimated base frequencies. A single data partition was employed and 15 calibration points were set (Supplementary Table 2; Supplementary Data 4); 14 nodes were calibrated following Springer et al. (2012)<sup>20</sup> and a 15<sup>th</sup> node was calibrated to the date corresponding to the age of *Panamacebus* (20.93 +/- 0.17 Ma). This node joins the

following platyrrhine genera: *Aotus*, *Callimico*, *Callithrix*, *Leontopithecus*, *Saguinus*, *Cebus* and *Saimiri*. The position of this calibration at this node was determined by the position of *Panamacebus* in our phylogenetic analysis. Based on the variation in the phylogenetic placement of *Panamacebus*, we took a conservative approach and calibrated the divergence of Cebinae and Callitrichinae as opposed to calibrating a node within Cebinae as suggested by the placement of *Panamacebus* in the phylogeny using the first molecular constraint (Fig.3a). All 15 priors were specified using a lognormal distribution (Supplementary Table 2). The root of the tree was specified with a uniform prior distribution with a mean value and an initial value of 83 (standard deviation = 1). The mean of the root was based on the estimated divergence of Euarchonta and Glires<sup>71</sup>. We used a gamma distribution for the “ucl.d.mean” prior with an initial value of 1, shape = 0.001, scale = 1,000. Other parameters were set to default priors. A random starting tree was used and analyses were conducted with an MCMC chain length of 200,000,000 states sampled every 10,000 states. We determined the number of states to remove prior to convergence of the MCMC chains after examining the summary statistics in Tracer v1.6 (Supplementary Table 5). Two independent replicate analyses were conducted for the Yule model and the birth-death model and similar results were obtained from these analyses. We combined the results of the replicate analyses for each model in Log Combiner v1.8 to increase the number of states available for analysis after excluding the burn-in. Maximum clade credibility trees were generated in TreeAnnotator v1.8<sup>67</sup> to summarize the trees (Supplementary Figs. 4-10).

### Methods: Paleogeographic Reconstruction (Fig. 4; Extended Data Figure 8)

Boundaries of the tectonic blocks used in the reconstruction (inset in Extended Data Figure 8) are mapped structures in regional and local maps. For the area of interest near the Canal Basin, major boundaries include the deformed belts north and south of Panama<sup>72-75</sup>, the Canal Basin faults<sup>30,76,77</sup>, eastern Panama and the Uramita fault<sup>78,79</sup>, and Northern Andes tectonic blocks<sup>80-82</sup>.

Early Miocene paleogeographic reconstruction was modified from published paleogeographic, paleomagnetic, and stratigraphic data. Boundaries of the tectonic blocks used in this reconstruction are mapped structures in regional and local maps. For the area

of interest near the Canal Basin, major boundaries include the deformed belts north and south of Panama<sup>73</sup>, the Canal Basin faults<sup>77</sup>, eastern Panama and the Uramita fault<sup>78</sup>, and Northern Andes tectonic blocks<sup>83</sup>.

The regional tectonic configuration of the late Oligocene-early Miocene<sup>84</sup> was modified for Panama with the palinspastic reconstruction of Panamá-northwestern Colombia<sup>30</sup>, Maracaibo<sup>85</sup>; Farallon<sup>86</sup>; Central America<sup>87</sup>; and Leeward Antilles<sup>88</sup>.

Paleomagnetic data suggests a paleolatitudinal shift from south to north through the Cenozoic for the Caribbean plate<sup>89</sup>, thus the reconstruction suggests a slightly more meridional position for the Isthmus than today. Data in two sites of the Azuero Peninsula indicate that the accreted seamount province<sup>90</sup> was located near equatorial paleolatitudes at the end of the Cretaceous<sup>91</sup> implying about 8° to 10° northward translation during the Cenozoic. Paleomagnetic data from ODP sites 999 and 1001 record a 5° to 15° northward translation of the Hess escarpment during Cenozoic times<sup>89</sup>. Published paleomagnetic data<sup>30</sup> from the volcanoclastic basement of central Panama, with a total of 12 sites with  $\alpha_{95} \leq 11^\circ$ , preliminarily suggest that the basement of the isthmus formed in southern paleolatitudes. Statistical reliability tests for near equatorial sites, however, require the number of sites to be greater than 30 with  $\alpha_{95} \leq 10^\circ$ <sup>92</sup>.

A regional strain marker was derived from the Campanian to Eocene magmatic arc of Panama<sup>73</sup> that is offset by a left-lateral strike-slip fault, and later overprinted by an Oligocene-Miocene arc. Piercing points were derived from integrated provenance analyses that constrain the postcollisional subduction character of the margin along northwestern Colombia<sup>93</sup>. Another piercing point for this reconstruction is the Eocene and younger interaction between the lesser Antilles and northern South America, well established by paleomagnetic and provenance analyses of conglomerates in Bonaire<sup>88</sup>.

Sedimentary environments were extrapolated from published stratigraphic sections, that were placed over the palinspastic reconstruction in the following locations:

- 1) Pacific sections that include conglomerate and sandy strata<sup>94</sup>; 2) upper Magdalena Basin<sup>95</sup>; 3) Amaga Formation coal-bearing and sandy-conglomeratic<sup>96</sup>; 4) Choco<sup>97</sup>; 5) easternmost Panama<sup>98</sup>; 6) western Panama<sup>99</sup>; 7) Panama<sup>100</sup>; 8) Canal basin<sup>101</sup>; 9) northwestern Colombia<sup>102,103</sup>; 10) Sierra Nevada Santa Marta, unnamed sandy and conglomeratic strata<sup>104</sup>; 11) Guajira Peninsula<sup>105</sup>; 12) Falcon<sup>106</sup>; 13) Falcon/Lara<sup>107</sup>; 14)

middle Magdalena Basin<sup>108</sup>; 15) Floresta Massif<sup>109</sup>; 16) axial Cordillera Oriental<sup>110</sup>; 17) foothills<sup>111</sup>; 18) southern middle Magdalena Basin<sup>112</sup>.

### **Methods: Paleobotanical Analysis of Miocene Forests**

We compiled pollen and spore occurrence data from nine different formations of Oligocene to middle Miocene age (Supplementary Table 3). The samples come from Florida<sup>113</sup>, Puerto Rico<sup>114</sup>, southern Mexico<sup>115-119</sup>, Costa Rica<sup>120</sup>, and Panama<sup>27</sup>; the number of samples per formation ranges from 2 to 52 (Supplementary Table 7). We assigned the plant families and genera to coarse biogeographic categories based on modern species distributions and fossil evidence following Gentry (1982)<sup>121</sup> and Jaramillo et al. (2014)<sup>27</sup>. The categories are Gondwana-Amazonian, Gondwana-northern Andean, Gondwana-southern Andean, Laurasian, or unassigned. Next, we calculated the percent contribution of the biogeographic regions to the species (morphotype) richness in each fossil flora. Taxa that were not assigned to a biogeographic region were excluded from calculations of biogeographic affinity following Jaramillo et al. (2014)<sup>27</sup>.

### **Methods: Biochronology**

The mammalian biochronology is summarized from the literature<sup>6-9,14,122-134</sup> and includes mid- to high latitude areas of North America but not the inferred temporal range extensions based on the Panama occurrences (Supplementary Table 6).

## **Supplementary Results**

### **Results: Stratigraphic Context of Lirio Norte Local Fauna**

The late Oligocene to early Miocene Bas Obispo and Las Cascadas formations represent the oldest subaerial sequences cropping out along the Panama Canal area<sup>77</sup>. They are characterized by massive accumulations of volcanoclastic sediments ranging from welded tuffaceous agglomerates and black vitric lavas to pyroclastic fall deposits and discrete intervals of more clastic fluvial sediments<sup>11,135</sup>. The basal part of the Las Cascadas Formation, mostly consisting of non-fossiliferous crudely layered volcanic breccias and tuffs, unconformably overlies the welded and massive volcanic agglomerates of the

middle to late Oligocene Bas Obispo Formation<sup>30</sup>. The upper part of the Las Cascadas Formation is characterized by fossiliferous volcanoclastic sequences<sup>6,7</sup> deposited in alluvial systems<sup>30</sup>. At the Lirio Norte locality (Extended Data Fig. 1), the fossiliferous sequence includes ~ 15 m of normally graded sequences composed predominately by lapilli tuffs locally conglomeratic, followed by green sandstones, conglomerates, volcanic breccias and agglomerates. Fossils are concentrated in fine-grained layers (lapilli tuffs and sandstones) but isolated remains are also present in coarser lithologies at the Lirio Norte locality (Fig. 1).

### Results: Geochronology of Lirio Norte Local Fauna

An ash layer that forms the upper-most part of a several meter thick, welded andesitic tuff within the Las Cascadas Formation was collected for radioisotopic dating. The tuff is exposed within the conformable section of the Las Cascadas Formation approximately 0.25 m below the principal mammalian fossil-bearing unit (Extended Data Fig. 2). A weighted mean of the  $^{206}\text{Pb}/^{238}\text{U}$  ages gives  $20.93 \pm 0.17$  Ma (2  $\sigma$ ) (Fig. 1), which we interpret to be the eruption age of the andesitic tuff and a close approximation of the absolute age of the Las Cascadas principal mammal fossil horizon, including the primate specimens. These data are likewise consistent with a  $^{206}\text{Pb}/^{238}\text{U}$  age of  $19.3 \pm 0.4$  Ma for a welded tuff unit within the overlying Culebra Formation<sup>30</sup>.

### Results: Biochronology: Lirio Norte Local Fauna

The overall biochronological signal of the mammals from the Las Cascadas Formation, Lirio Norte Local Fauna (L.F.), is taken from the individual biochrons of the taxa that have been studied or identified so far from the fossiliferous horizon. The faunal list (Extended Data Table 1) is evolving as we continue to make new discoveries, but nevertheless we interpret an unambiguous biochronological signal that relates to what is known from North American Land Mammal Ages (NALMAs) from high-latitude North America, where these biochrons (generic level) are characterized (e.g., Tedford et al. 2004<sup>14</sup>; Albright et al. 2008<sup>13</sup>). Seventeen mammal species classified in sixteen genera, are currently recognized from the Lirio Norte L.F. (Supplementary Table 6). When comparing these taxa to their occurrences in high-latitude North America, 10 genera have



meaningful biochronological significance, whereas six remain unstudied and are not yet informative regarding biochronology. Five of the genera are known to co-occur in Arikareean (Ar) faunal zone 3, seven or eight of the genera co-occur within Ar4, ten in Hemingfordian (He) faunal zone 1, four in He2, and three thereafter during the Barstovian NALMA (Extended Data Fig. 3). Two of the occurrences, those of the immigrant taxa *Cynelos* and the blastomerycine, are of particular importance because their First Appearance Datums (FADs) define the beginning of Ar4, *sensu* Tedford et al. (2004<sup>14</sup>). Furthermore, a number of taxa (e.g., *Texomys*, *Cynelos*, *Arretotherium*, *Aguscalientia*) do not persist in the known fossil record beyond He1, and *Petauristodon* and aff. *Bassaricyonoides* are otherwise known from He1 and younger localities at higher latitudes. Thus, the age of the Lirio Norte L.F. is no older than Ar4 and no younger than He1. The radiometric date reported here of  $20.93 \pm 0.17$  Ma helps to refine this estimate, demonstrating a correlation to Ar4 (22.8 and 18.5 Ma<sup>13</sup>). The Arikareean occurrences of *Petauristodon* and *Bassaricyonoides* are thus interpreted as temporal and geographic range extensions in Panama.

### Results: Detailed Description of *Panamacebus transitus*

Seven isolated teeth (Fig 2; Extended Data Figs. 4–7) are here referred to *P. transitus* based on their proximity, similarity in size, and morphologies consistent with identification as those of a single taxon of New World monkey.

*Upper molars*—The holotype (UF 280128) of *P. transitus* is an isolated complete crown of an unworn left M<sup>1</sup> with no roots. The enamel is moderately crenulated and the crown is rectangular in occlusal view with dimensions (M<sup>1</sup> mesiodistal length [ML] = 4.42 mm; buccolingual width [BW] = 5.94 mm) consistent with those of a medium sized New World Monkey (est. 2.7 kg<sup>136</sup>) in the range of the White-Headed Capuchin (*Cebus capucinus*) that lives in Panama today. The crown is only slightly narrower lingually (~8%) than buccally and is comprised of four distinct cusps with the paracone the tallest, the metacone and protocone somewhat shorter and similar in height to each other, and a smaller, yet distinct, hypocone located slightly lingual to the protocone. The three major cusps are bulbous and massive, somewhat set apart with a relatively broad, shallow trigon



basin. A strong prehypocrista extends from the hypocone buccolingually to the postprotocrista and encloses the talon lingually. A sharp, distinct hypoparacrasta extends lingually from the paracone to the buccal margin of the preprotocrista, forming the distal border of a small rectangular mesial basin (=mesial fovea<sup>16</sup>). Likewise, a distinct hypometacrasta extends from the metacone to join the postprotocrista at the intersection with the prehypocrista. The distolingual cingulum of  $M^1$  is well developed, forming a narrow shelf that extends from a moderately sized and distinct hypocone, wraps around the lingual aspect of the protocone, and terminates at the level of the protocone on the mesial margin of the crown. The  $M^1$  lacks a mesostyle, metaconule, and paraconule.

An isolated left  $M^2$  (UF 281001) possesses a partial lingual root, exhibits minor abrasion on the crenulated enamel of the occlusal surface, and is smaller than that of the  $M^1$  ( $M^2$  ML = 3.62 mm; BW = 4.84 mm). The crown of  $M^2$  is somewhat narrower lingually (16%) than buccally giving it a slight triangular profile. In comparison to the  $M^1$ , the paracone and protocone of the  $M^2$  are more similar in height with a slightly smaller metacone and, although the hypocone is somewhat broken, it would have been a distinct cusp similar to that of  $M^1$ . The  $M^2$  has a well-developed lingual cingulum, but the cingulum is relatively shorter than that of the  $M^1$ , terminating lingual to the protocone at a poorly-developed entoprotocrista. The position, orientation, and development of other cristae are similar to that of  $M^1$  with the exception of the hypometacrasta terminating buccally to the intersection of the postprotocrista and prehypocrista. As for  $M^1$ , the  $M^2$  lacks a mesostyle, metaconule, and paraconule.

*Lower incisors*—A partial left  $I_1$  (UF 280130) preserves about two-thirds of an apparently moderately tall and vertical crown that was likely spatulate, with distal widening evident towards the broken tip. In cross-section, the crown of  $I_1$  is oval (ML/BW] = 0.68] with well-developed enamel and lingual swelling at the base. Distal and mesial lingual crests are present but do not meet on the lingual heel to form a lingual cingulid. A right  $I_2$  preserves part of the root and a complete crown, somewhat larger than that of  $I_1$  (ratio of cross sectional areas,  $I_1/I_2 = 0.83$ ). The crown of a right  $I_2$  (UF 267048) is similar to that of  $I_1$  in being moderately high, vertical, spatulate, oval in cross section (ML/BW = 0.66), and having well-developed enamel with strong lingual swelling

at the base and well-developed, yet separate, distal and mesial crests. In lateral view, the lower incisor crowns are gently curved. The presence of an anterior interstitial facet on  $I_2$  indicates a lack of spacing between the incisors and wear on the edges of the  $I_2$  crown indicate that the lower incisors would have formed an arcuate battery.

*Lower canine*—A right  $C_1$  (UF 280131) preserves a nearly complete root and crown (with some missing enamel). The crown is considerably taller and larger in cross-sectional area than that of the incisors, with a rounded lingual crest and a raised and unbroken lingual cingulum that runs from a large distal heel to the mesial terminus of the paracristid.

*Lower premolars*—Two isolated lower premolars (UF 280127, left  $P_2$ ; UF 280129, left  $P_4$ ), with complete crowns and most of their roots, were recovered in direct association with each other and with similar wear patterns suggesting the possibility that they belong to a single individual. Both lower premolars are single rooted. Both premolars are moderately high crowned and inflated, with sloping cusp margins. The trigonid of  $P_2$  is unicuspid with a protoconid but no metaconid, and the talonid is small and lacks a hypoconid and entoconid. The crown of  $P_4$  has a lingually expanded protoconid that is connected to a closely set and relatively smaller metaconid by a short transversely-oriented protocristid. The talonid of the  $P_4$  is relatively broad and bordered by a weakly-developed hypoconid and entoconid.

### **Results: Comparative Morphology of *Panamacebus transitus***

Comparisons were done within the morphological framework outlined and discussed in Kay et al. (2008)<sup>31</sup> and Kay (2015)<sup>1</sup> with reference to the literature for fossil taxa (see Methods).

Discovery of a fossil monkey in the early Miocene of Panama, recovered from a basin that was connected with North American continental terrains, together with a diversity of other mammals with exclusively North American and Eurasian affinities, might suggest a comparison to Old World Monkeys (catarrhines) that likely similarly dispersed from Africa into Asia by the early Miocene<sup>137</sup>. In fact, the upper molars of *Panamacebus* compare fairly well with those of early Miocene pliopithecids from

China<sup>138</sup> in having a somewhat rectangular outline in occlusal view, relatively low and rounded cusps, a distinct hypocone, a well-developed prehypocrista, a broad and well developed lingual cingulum, and lack of distinct conules. However, the lower premolars of *Panamacebus* contrast strongly with those of catarrhines in retaining a P<sub>2</sub> (lost in Old World Monkeys) and in having a single-root on P<sub>4</sub> (it is double rooted in Old World Monkeys). Thus, *Panamacebus* is clearly part of the platyrrhine radiation despite its geographic location outside of South America.

*Upper molars*—The M<sup>1</sup> of *Panamacebus* is notably larger in occlusal area than that of M<sup>2</sup>, a condition within Cebidae that is more similar to that of extant callitrichines than that of extant or fossils cebines, including *Neosaimiri* from the Middle Miocene of Colombia (Extended Data Fig. 4) and extant *Cebus* (Extended Data Fig. 5), which have a relatively larger M<sup>2</sup> (although still smaller than M<sup>1</sup>). We note that this condition appears to have evolved several times in platyrrhine evolution (e.g. middle Miocene pitheciid *Cebupithecia* (Supplementary Fig. 2) and Quaternary *Xenothrix* from Jamaica have similar proportions). The M<sup>1-2</sup> of *Panamacebus* is similar to that of most platyrrhines in lacking inflation of the protocone. This contrasts with the presence of an inflated protocone found on the upper molars of *Acrecebus* + *Cebus* (Extended Data Fig 5), pitheciids (except *Callicebus*), and *Xenothrix*. The M<sup>1-2</sup> of *Panamacebus*, however, exhibit a buccally expanded paracone, similar to that of other cebines (except *Aotus*), some atelids, all pitheciids, and some stem platyrrhines. Notably, the most basal stem platyrrhines including *Perupithecus*, *Branisella*, *Soriacebus*, *Mazzonicebus*, and *Homunculus* lack this condition indicating that the buccal expansion likely evolved several times in platyrrhine evolution.

Among crown platyrrhines, the M<sup>1</sup> of *Panamacebus* is similar to that of cebines, atellids, and pitheciids in having a large hypocone, in contrast to that of callitrichines in which it is either absent or reduced. A large hypocone on M<sup>1</sup> is also characteristic of many stem platyrrhines, although the more reduced condition of the hypocone in *Tremacebus*, *Soriacebus*, *Branisella*, and *Perupithecus* may be the plesiomorphic condition for the clade. The hypocone on M<sup>2</sup> of *Panamacebus* is also relatively large, similar to that of most crown platyrrhines (except callitrichines in which it is lacking, and

certain pitheciines, including *Chiropotes* and *Cebupithecia* [Supplementary Fig. 3], in which it is more reduced) and many stem platyrrhines (except *Xenothrix*, *Tremacebus*, *Soriacebus*, and *Branisella* in which it is more reduced).

As for nearly all crown platyrrhines (with the exception of *Callimico*), the crowns of  $M^{1-2}$  of *Panamacebus* lack a paraconule. Among stem platyrrhines, this characteristic is probably plesiomorphic, with *Perupithecus*, *Branisella*, *Mazzonicebus*, and *Soriacebus* also lacking a paraconule, although it is present in others, including *Dolichocebus*, *Chilecebus*, *Tremacebus*, *Carlocebus*, and *Homunculus*. Lack of a metaconule on  $M^{1-2}$  of *Panamacebus* is a shared characteristic with other platyrrhines with the exception of the cebine clade *Acrecebus* + *Cebus* (Extended Data Fig 5) and the callitrichine *Callimico*. We should note that a metaconule is variably present in a number of platyrrhines, including *Branisella*. Lack of a mesostyle on  $M^{1-2}$  of *Panamacebus* is similar to that of other cebines and many other platyrrhines (including *Perupithecus*), although it is present in most callitrichines, some atelids (e.g., *Brachyteles*, *Alouatta*, *Stirtonia*), and the stem platyrrhines *Paralouatta* and *Dolichocebus*. *Panamacebus* is similar to most other platyrrhines, with the exception of *Leontopithecus*, *Saimiri*, *Antillothrix*, *Paralouatta*, and *Tremacebus*, in lacking a pericone on its upper molars. The variable appearance of a paraconule, metaconule, mesostyle, and pericone among stem and crown platyrrhines suggests independent evolution of cusps in these positions.

The  $M^{1-2}$  postprotocrista of *Panamacebus* is similar to that of other cebids (except *Acrecebus* + *Cebus*; Extended Data Fig 5) in that it is continuous with a hypometacrista that reaches to the base of the metacone. This contrasts with the condition in atelids (except *Stirtonia*), pitheciids (except *Cebupithecia* [Supplementary Fig. 3]), and most stem platyrrhines (except *Xenothrix*, *Soriacebus*, and *Branisella*) in which this crest does not reach the base of the metacone. As for all platyrrhines except *Mazzonicebus* and *Soriacebus*, the  $M^{1-2}$  of *Panamacebus* lacks a postprotocrista spur (Kay, 2015<sup>1</sup>). While otherwise highly variable within platyrrhines, the  $M^{1-2}$  of *Panamacebus* is similar to other cebids (except *Cebuella* and *Acrecebus* + *Cebus*; Extended Data Fig 5) in having a sharp hypometacrista. *Panamacebus* is similar to almost all other platyrrhines in having an  $M^{1-2}$  prehypocrista that is oriented buccolingually towards the postprotocrista. In contrast, *Cebus* and *Acrecebus* have a more buccally oriented prehypocrista<sup>53</sup>. On the other hand,

among cebids *Panamacebus* is most similar to *Aotus* and *Acrecebus* + *Cebus* (Extended Data Fig. 5) in having a strong  $M^{1-2}$  prehypocrista rather than the weak-to-absent condition of *Saimiri* and *Neosaimiri* (Extended Data Fig. 4). We note that while this characteristic is somewhat variable within clades, a strong hypocrista may be plesiomorphic for crown platyrrhines (it is also strong in *Xenothrix*, but otherwise reduced or absent in other stem platyrrhines). As for all extant and fossil platyrrhines (with the exception of *Homunculus* and *Dolichocebus*) the crowns of  $M^{1-2}$  of *Panamacebus* lack a preprotoconule crista.

The  $M^{1-2}$  of *Panamacebus* is similar to that of other cebids in having a strong and complete lingual cingulum (except *Saguinus* and *Aotus* in which it is weak). While a weak or absent lingual cingulum is also present in atelids, some pitheciids and the stem platyrrhines *Xenothrix* and *Carlocebus*, it is likely that the strong condition exhibited by *Panamacebus* is plesiomorphic for Platyrrhini (it is well developed in both *Perupithecus* and *Branisella*). The  $M^{1-2}$  of *Panamacebus* is similar to that of many other platyrrhines (including *Perupithecus*) in lacking a buccal cingulum, in contrast to that of callitrichines, some atelids, and the stem platyrrhines *Paralouatta*, *Carlocebus*, *Homunculus*, and *Branisella* that have a buccal cingulum (although it is variably expressed in several of these taxa). Among cebids the  $M^{1-2}$  of *Panamacebus* is similar to *Saimiri*, *Neosaimiri* (Extended Data Fig. 4), and most callitrichines (except *Saguinus*) in having an anterior cingulum, as opposed to the weak or absent condition of *Aotus* and *Acrecebus* + *Cebus* (Extended Data Fig 5). More broadly, presence of an anterior cingulum is found throughout Platyrrhini, with several likely losses in pitheciines (e.g., *Callicebus*) and stem platyrrhines (e.g., *Antillothrix*, *Paralouatta*, *Dolichocebus*, *Chilecebus*).

*Lower incisors* (Extended Data Fig. 6)—Both *Panamacebus* and *Aotus* have an  $I_1$  crown that is almost as large as that of  $I_2$ , which differs from that of other cebines. In this way, they are more similar to most callitrichines (except *Saguinus*) and contrast with the rest of Platyrrhini (except *Paralouatta*) which all have a relatively smaller  $I_1$ . The rounded cross-sectional shape of  $I_2$  is similar to that of many platyrrhines including most cebids (except *Cebuella* and *Callithrix*) and atelids. This contrasts with the mesiodistally compressed cross-sectional area of the  $I_2$  of pitheciids (except *Callicebus* and *Pithecia*) and the stem

platyrrhines *Mazzonicebus* and *Soriacebus*. *Panamacebus* has moderately high crowned incisors (higher than that of other cebines) similar to those of some callitrichines (e.g., *Saguinus*, *Lagonamico*), *Callicebus*, and *Homunculus*. The spatulate shape and gently curved buccal outlines of the incisor crowns of *Panamacebus* are similar to those of all other platyrrhines except those of *Cebuella* and *Callithrix* which have more acutely curved buccal outlines with a more lanceolate shape. *Panamacebus* has a strong lingual swelling (“heel”) on the base of the crown of I<sub>2</sub>, similar to that of other cebids (except *Cebuella* and *Callithrix*) and atelids. In contrast, the I<sub>2</sub> of pitheciids (except *Callicebus*), *Paralouatta*, *Mazzonicebus*, and *Soriacebus* lack lingual swelling. *Panamacebus* has a strong lingual cingulum on its lower incisor similar to of other cebids (except *Lagonamico* and *Mohanamico* which lack a cingulum) but differs from most cebids (except *Cebuella*) in that the cingulum is not complete. Atelids also have a lingual cingulum (incomplete in all but *Brachyteles* and *Lagothrix*) and both *Dolichocebus* and *Branisella* have a complete lingual cingulum.

*Lower canine*—The rounded cross-sectional shape of the C<sub>1</sub> of *Panamacebus* is similar to that of all other platyrrhines except that of *Cebuella* and *Callithrix* in which it is mesiodistally compressed. Likewise, the C<sub>1</sub> of *Panamacebus* is similar to most other platyrrhines in having a rounded lingual crest. In contrast, the lingual crest of *Aotus*, *Mohanamico*, and some pitheciids (e.g., *Pithecia*, *Cacajao*, *Chiropotes*, *Cebupithecia* [Supplementary Fig. 2]) is sharper. The C<sub>1</sub> is similar to that of other platyrrhines (except *Paralouatta*) in having a tall crown that would have extended at or above the tooth row, with an obliquely oriented paracristid.

*Lower premolars*—The lower premolars of *Panamacebus* are relatively inflated, with sloping cusp margins, similar to the condition among cebines which otherwise have less inflated crowns with more marginally positioned cusps (e.g., *Saimiri*, *Neosaimiri* [Fig. 2], *Aotus*). In this way *Panamacebus* lower premolars are also similar to those of all stem platyrrhines (except *Branisella* which lacks inflation) as well as certain callitrichines (e.g., *Cebuella*, *Callithrix*, *Leontopithecus*), certain pitheciids (e.g., *Cebupithecia*, *Nuciraptor*, *Proteropithecia*), and *Ateles*.

The P<sub>2</sub> of *Panamacebus* lacks a buccal cingulum, which is true for all other platyrrhines except *Carlocebus*. The P<sub>2</sub> metaconid of *Panamacebus* is only defined by swelling, without a clear cusp present. In this way it is similar to that of most other platyrrhines with the notable exceptions among cebids and the pitheciid *Chiropotes* for which it is larger and better defined.

The P<sub>4</sub> of *Panamacebus*, while somewhat worn in this region, is similar to all other platyrrhines in having a very reduced paraconid (if it was present at all). As for many other platyrrhines, the cristid obliqua on the P<sub>4</sub> is weak in *Panamacebus*; in contrast, it is stronger in some pitheciids (e.g. *Pithecia*, *Cacajao*, *Chiropotes*). The metaconid on the P<sub>4</sub> of *Panamacebus* is similar to that of most other platyrrhines in being widely spaced from the protoconid, as opposed to the more closely spaced condition in some callitrichines (e.g., *Cebuella*, *Callithrix*, *Saguinus*, *Lagonamico*) and *Paralouatta*. As for nearly all crown platyrrhines, the lingual wall of the P<sub>4</sub> trigonid is closed by the premetacristid to form a basin in *Panamacebus*. In contrast the atelids *Brachyteles* and *Stirtonia* (Supplementary Fig. 2), the pitheciid *Nuciraptor*, and the stem platyrrhines *Dolichocebus* and *Homunculus* lack a lingual basin. There is a distinct oval wear patch in the position of entoconid on the P<sub>4</sub> of *Panamacebus*, indicating that this cusp was present as in other cebines, but unlike that of callitrichines which all lack a distinct entoconid. While presence of a distinct entoconid is found in many platyrrhines, it is lacking in *Ateles*, *Chiropotes*, *Cebupithecia* (Supplementary Fig. 2), *Paralouatta*, *Mazzonicebus*, and *Branisella* indicating that its loss happened many times in the evolution of the group. The lateral and medial protocristid is continuous between the metaconid and protoconid on the P<sub>4</sub> of *Panamacebus*, similar to that of all other platyrrhines except *Brachyteles* (which lacks a lateral protocristid altogether) and *Mazzonicebus* in which it is not continuous. As for all crown platyrrhines and the stem platyrrhines *Homunculus* and *Branisella*, the P<sub>4</sub> lateral protocristid of *Panamacebus* is transversely oriented, as opposed to the rest of stem platyrrhines in which it is distolingually oriented. The P<sub>4</sub> hypoconid of *Panamacebus* is similar among cebines to that of *Saimiri* and *Neosaimiri* in being positioned distal to the metaconid. In contrast, it is distal to the protoconid in *Cebus* (Extended Data Fig. 7) and *Aotus*, similar to that of most callitrichines, pitheciids, and stem platyrrhines (except *Xenothrix* and *Paralouatta*). In *Panamacebus* the P<sub>4</sub>



hypocrista is similar to other platyrrhines in lacking the strong shearing development found in the pitheciids *Pithecia*, *Cacajao*, and *Chiropotes*. While the length of the talonid relative to that of the trigonid of P<sub>4</sub> is highly variable among platyrrhines, they are of similar length in *Panamacebus* (midline of the trigonid/midline of the talonid= 1.51/1.62) most similar among cebines to that of *Cebus* (Extended Data Fig. 7). In contrast, the relative length of the talonid is shorter in *Saimiri*, *Neosaimiri* (Extended Data Fig. 6), and *Aotus*.

### Results: Phylogenetic Analysis of *Panamacebus*

We successfully replicated the results of the phylogenetic analysis conducted by Kay (2015)<sup>1</sup> before adding *Panamacebus* to this data set (results not shown). Our first analysis contained *Panamacebus* and used the same parameters set by Kay (2015)<sup>1</sup>, including ordering 177 characters and weighting 399 characters. This analysis resulted in two well resolved most parsimonious (MP) trees that are 126,733 steps in length (Fig. 3a, Supplementary Fig. 4). These two MP trees differ only in the presence of sister group relationship between *Cebupithecia* and *Nuciruptor* in one tree, whereas in the other tree this sister group relationship is not recovered, though *Cebupithecia* is adjacent to *Nuciruptor*. In the strict consensus of these trees *Panamacebus* falls within crown Platyrrhini, specifically within Cebidae (Supplementary Fig. 5).

To explore the effect of weighting and ordering on the placement of *Panamacebus* and the stability of the overall tree topology, we conducted three additional analyses using Kay's (2015)<sup>1</sup> constraint tree with different combinations of ordered and weighted characters. Our analysis with characters ordered and equally weighted yielded 11 MP trees with 2,083 steps. In the strict consensus of these trees (Supplementary Fig. 6), the majority of taxa form a polytomy, though there is some resolution at the tips of the tree within the Callitrichinae, Atelidae and within the outgroup taxa *Aegyptopithecus*, *Hylobates*, *Miopithecus*, and *Presbytis*. When all characters were weighted but none were ordered we obtained one MP tree 119,479 steps in length (Supplementary Fig. 7). Callitrichinae and Cebidae are well resolved in this tree and the position of *Panamacebus* is maintained within Cebinae, as in the analysis with characters ordered and weighted. When characters are equally weighted and un-ordered we obtained 66 MP trees 1,935

steps in length. The strict consensus of these trees is highly unresolved, with the majority of taxa forming a polytomy (Supplementary Fig. 8). The relationships within Callitrichinae are well resolved but *Panamacebus* is more closely related to Callitrichinae than to Cebinae. Relationships within Cebinae are completely unresolved in this tree and Atelidae and Pitheciidae are non-monophyletic.

The results of the analysis using the constraint tree derived from Springer et al. (2012)<sup>20</sup> and the unconstrained analysis demonstrate the influence of the constraint tree on the tree topology. Conducting the analysis with characters ordered and weighted following Kay (2015)<sup>1</sup> with a different constraint tree derived from Springer et al. (2012)<sup>20</sup> yielded 4 MP trees with a length of 127,183 steps. Overall the topology of the strict consensus of these trees (Supplementary Fig. 9) is similar to the analysis using Kay's constraint tree, but there is less resolution within Cebidae with sister taxa *Cebus* and *Acrecebus*, *Saimiri* and *Neosaimiri* forming a polytomy with *Aotus* and *Panamacebus*. The relationships within Callitrichinae, however, are well resolved and the remainder of the tree topology is identical to the result from the analysis using Kay's constraint tree.

We obtained five MP trees from the unconstrained analysis with all characters ordered and weighted following Kay (2015)<sup>1</sup> with a length of 124,010 steps. The strict consensus of these trees (Supplementary Fig. 10) is poorly resolved; Cebinae, Callitrichinae, and Atelidae are all non-monophyletic. *Panamacebus* falls out in a polytomy with taxa from the Greater Antilles, *Paralouatta*, *Xenothrix*, and *Antillothrix*. The results of our phylogenetic analyses are influenced heavily by the constraint tree used, as illustrated by the comparisons with our unconstrained analysis (Fig. 3c) in which the new taxon forms a polytomy with fossil taxa from the Greater Antilles. The low bootstrap support for the position of *Panamacebus* (<50) is a reflection of the large amount of missing data for this taxon in the character matrix. Ordering and weighting characters following Kay (2015)<sup>1</sup> also influences the topology of the tree; altering or removing these *a priori* assumptions results in a poorly resolved tree topology with low bootstrap support (<50) at many nodes.

Overall, these results demonstrate the high sensitivity of this analysis to character weighting and, to a lesser extent, ordering. The placement of *Panamacebus* in these trees

varies depending on the whether characters are ordered and/or weighted and whether the analysis is constrained or unconstrained. In part this is because of the relative lack of morphological data for this new taxon; once more material is recovered it should be re-analyzed in a new morphological character taxon matrix to better understand the relationship of *Panamacebus* to other Platyrrhini.

### Results: Divergence Dating Analysis

The divergence estimates resulting from our analysis (Extended Data Figs. 9-10) of the reduced sequence alignment derived from Springer et al. (2012)<sup>20</sup> are congruent with results from the previous analysis<sup>20</sup>. The analyses conducted under both birth-death and Yule models yielded highly similar, well-supported results with respect to both the divergence estimates and the tree topology (Supplementary Table 5, Extended Data Figs. 9-10). For clarity, here we refer only to specific dates from the maximum clade credibility tree from the birth-death analysis (Extended Data Fig. 9).

For each calibrated node, our 95% credibility intervals overlap with those of Springer et al. (2012)<sup>20</sup>. Our estimate of the split between Haplorhini and Strepsirrhini has a wider range than previously reported<sup>20</sup> falling between 61.56-81.42 Ma (posterior probability [PP]: 0.83), in contrast to Springer et al.'s (2015)<sup>20</sup> date of 60.99-76.72 Ma. The estimate for the divergence of Platyrrhini and Catarrhini (most recent common ancestor [MRCA] of Simiiformes) falls between 30.82-44.41 Ma (PP:1.0). These dates overlap with, but are slightly younger than, those reported by Springer et al. (33.55-49.48 Ma) and by Kiesling et al. (2015)<sup>18</sup> (36.04-42.07 Ma).

We estimate that the divergence of pitheciids from atelids and cebids occurred 22.93-27.14 Ma (PP:0.99) which aligns with Springer et al.'s estimate (19.26-27.49 Ma), and is also congruent with Kiesling et al.'s (2015)<sup>18</sup> date of 25.14-26.36 Ma. Importantly, our new divergence estimate for the split between Callitrichinae and Cebinae, based on the phylogenetic position of *Panamacebus* and calibrated with the radioisotopic date (20.77-21.90 Ma, PP: 1.0), overlaps with the range estimated by Springer et al. (2012)<sup>20</sup> (16.07-23.5 Ma) and narrows the estimated range from 7.43 Ma to just 1.13 Ma. This range also overlaps with the dates obtained by Perelman et al. (2011)<sup>21</sup> (15.66-24.03 Ma). Our inferred divergence of Cebidae from Atelidae (21.84-24.93 Ma, PP:0.99) also

reduces the interval estimated for this split from 7.97 Ma (Springer et al., 2012)<sup>20</sup> to 3.09 Ma. Springer et al. (2012)<sup>20</sup> estimated that the divergence between Cebids and Atelids was 18.14–26.11 Ma.

Our estimate for the split between *Cebus* and *Saimiri* is 13.83–19.77 Ma (PP:1.0), a range that is slightly narrower than the estimate obtained by Springer et al. (2012)<sup>20</sup> (13.76–20.79 Ma). This difference is subtle but relevant because it likely results from our new fossil calibration. Furthermore, multiple other divergence estimates within Platyrrhini are also narrower than the estimates obtained by Springer et al. (2012)<sup>20</sup> including MRCA estimates for *Pithecia*, *Chiropotes*, *Callicebus*, *Brachyteles*, *Lagothrix*, *Ateles*, Cebidae, *Cebus*, and *Callithrix*. The divergence of *Aotus* from other cebids (*Saguinus* + *Leontopithecus* + *Callithrix*) falls between 19.33–21.55 Ma (PP:1.0).

The MRCA of Catarrhini is estimated at 20.67–27.68 Ma (PP:1.0), which is congruent with both Springer et al. (2012)<sup>20</sup> (19.67–32.83 Ma) and Perelman et al. (2011)<sup>21</sup> (25.66–37.88 Ma).

### Results: Paleobotanical Analysis of Miocene Forests and Platyrrhine Distributions

The floras in Southern Mexico, and Florida have a significantly larger Laurasian component than the flora of Costa Rica and Panama during the early Miocene (Supplementary Table 7). Despite the presence of the Central American Seaway during the early Miocene, the floras of southern Central America (southern Costa Rica and Panama) are composed of almost exclusively South American (Gondwanan) taxa<sup>27,121</sup>. Our data indicate that there was a gradient in tropical forest composition from primarily Gondwanan taxa in Costa Rica and Panama to more Laurasian taxa in Southern Mexico and Florida (Supplementary Table 3).

This dichotomy could be explained by the relative antiquity of the landscapes and species-area effects. Most of Mexico and the Gulf Coast have had terrestrial landscapes at least since the Eocene. These habitats were fully connected to the North American continent and were consequently occupied by Laurasian forests. By contrast, terrestrial landscapes of Panama and Costa Rica are much younger, and only were developed extensively until the early Miocene. These areas were essentially a new terrestrial landscape that emerged from the oceans during the lower part of the early Miocene.

Fossil evidence indicates that these territories were first colonized by Gondwanan-derived South American taxa rather than by Laurasian forests, even though there was a physical connection with Mexico/Gulf Coast while a seaway separated Panama from South America. Why that would be the case is still an unsolved question. A possible explanation is the combination of strong niche conservatism and biome area.

Gondwanan-South American tropical forests of the Miocene covered extensive areas of South America, an area almost as large as North America. By contrast, Laurasian Mexican tropical forests of the Miocene occupied a much smaller area. Once the new tropical landscape of Costa Rica and Panama emerged, Gondwanan-South American tropical forests, derived from a much larger species pool, were able to move into these new territories where they outcompeted Laurasian forests.

This gradient of forest type in Central America could have limited the northern range of platyrrhines in the Neotropics during the early Miocene if platyrrhine distribution is governed by the availability of suitable forest habitat rather than climate. Whereas important elements of the Gondwanan flora for platyrrhines include Moraceae, Fabaceae, Chrysobalanaceae, Sapotaceae, Arecaceae, and Anacardiaceae, the most important elements of the tropical Laurasian flora include Juglandaceae (*Engelhardia*, *Carya*), Fagaceae (*Quercus*), Pinaceae and Ulmaceae.

The forests of Amazonia and tropical Africa share many plant families and genera. Historically, this pattern has been explained by the continents' shared gondwanan history<sup>139-141</sup>; however, floristic exchange between tropical Africa and tropical south America has continued since the Late Cretaceous and throughout the entire Cenozoic by long-distance dispersal events facilitated by ocean circulation patterns<sup>142-151</sup>. During the early Miocene, the Gondwanic broadleaf forests of southern South America (Patagonia) were likewise more similar to Gondwanic tropical South America (Amazonia) than to Laurasian forests at equivalent latitude in North America<sup>152</sup>. Important elements of Patagonian broadleaf forests that have been identified in early Miocene pollen records include Arecaceae, *Bombax*, *Coupania*, Lauraceae, Malpighiaceae, and Rubiaceae<sup>153,154</sup>. Because closely related plants tend to be ecologically similar<sup>150</sup>, we suggest that the ecological requirements of platyrrhine monkeys were met in the Gondwanan forests of Patagonia, but not by the Laurasian forests of Southern Mexico and further north. By the

middle Miocene, however, the expansion of arid climates and open vegetation at high southern latitudes<sup>153,154</sup> likely contributed to the restriction of New World Monkeys to tropical forests.

### Supplementary References (not included in Text, Methods, or Extended Data)

- 31 Kay, R. F. *et al.* The anatomy of *Dolichocebus gaimanensis*, a stem platyrrhine monkey from Argentina. *J. Hum. Evol.* **54**, 323-382 (2008).
- 32 Takai, M. & Anaya, F. New specimens of the oldest fossil platyrrhine, *Branisella boliviana*, from Salla, Bolivia. *Am. J. Phys. Anthropol.* **99**, 301-317 (1996).
- 33 Takai, M., Anaya, F., Shigehara, N. & Setoguchi, T. New fossil materials of the earliest New World monkey, *Branisella boliviana*, and the problem of platyrrhine origins. *Am. J. Phys. Anthropol.* **111**, 263 (2000).
- 34 Flynn, J. J., Wyss, A. R., Charrier, R. & Swisher, C. C. An early Miocene anthropoid skull from the Chilean Andes. *Nature* **373**, 603-607 (1995).
- 35 Hershkovitz, P. Notes on Tertiary platyrrhine monkeys and description of a new genus from the late Miocene of Colombia. *Folia Primatol.* **12**, 1-37 (1970).
- 36 Kay, R. F., Campbell, V. M., Rossie, J. B., Colbert, M. W. & Rowe, T. B. Olfactory fossa of *Tremacebus harringtoni* (Platyrrhini, early Miocene, Sacanana, Argentina): implications for activity pattern. *The Anatomical Record Part A: Discoveries in Molecular, Cellular, and Evolutionary Biology* **281**, 1157-1172 (2004).
- 37 Kay, R. F. A new primate from the early Miocene of Gran Barranca, Chubut Province, Argentina: paleoecological implications. *The Paleontology of Gran Barranca: Evolution and Environmental Change through the Middle Cenozoic of Patagonia*, 220-239 (Cambridge University Press, 2010).
- 38 Fleagle, J. G., Powers, D. W., Conroy, G. & Watters, J. New fossil platyrrhines from Santa Cruz province, Argentina. *Folia Primatol.* **48**, 65-77 (1987).
- 39 Fleagle, J. G. New fossil platyrrhines from the Pinturas Formation, southern Argentina. *J. Hum. Evol.* **19**, 61-85 (1990).
- 40 Tejedor, M. F., Tauber, A. A., Rosenberger, A. L., Swisher, C. C. & Palacios, M. E. New primate genus from the Miocene of Argentina. *Proceedings of the National Academy of Sciences* **103**, 5437-5441 (2006).
- 41 Tejedor, M. F. & Rosenberger, A. A neotype for *Homunculus patagonicus* Ameghino, 1891, and a new interpretation of the taxon. *PaleoAnthropology* **2008**, 68-82 (2008).
- 42 Perry, J. M., Kay, R. F., Vizcaíno, S. F. & Bargo, M. S. Oldest known cranium of a juvenile New World monkey (Early Miocene, Patagonia, Argentina): Implications for the taxonomy and the molar eruption pattern of early platyrrhines. *J. Hum. Evol.* **74**, 67-81 (2014).
- 43 Kay, R. F., Johnson, D. & Meldrum, D. J. A new pitheciin primate from the middle Miocene of Argentina. *Am. J. Primatol.* **45**, 317-336, doi:10.1002/(sici)1098-2345(1998)45:4<317::aid-ajp1>3.0.co;2-z (1998).
- 44 Meldrum, D. J. & Kay, R. F. *Nuciraptor rubricae*, a new pitheciin seed predator from the Miocene of Colombia. *Am. J. Phys. Anthropol.* **102**, 407-427 (1997).



- 45 Luchterhand, K., Kay, R. & Madden, R. *Mahanico hershkovitzi*, gen. et sp. nov., un primate du Miocène moyen d'Amérique du Sud. *Comptes rendus de l'Académie des sciences. Série 2, Mécanique, Physique, Chimie, Sciences de l'univers, Sciences de la Terre* **303**, 1753-1758 (1986).
- 46 Stirton, R. A. *Ceboid monkeys from the Miocene of Colombia*. (University of California Press Berkeley, 1951).
- 47 Kay, R. F., Madden, R. H., Plavcan, J. M., Cifelli, R. L. & Diaz, J. G. *Stirtonia victoriae*, a new species of Miocene Colombian primate. *J. Hum. Evol.* **16**, 173-196 (1987).
- 48 Takai, M. New specimens of *Neosaimiri fieldsi* from La Venta, Colombia: a middle Miocene ancestor of the living squirrel monkeys. *J. Hum. Evol.* **27**, 329-360 (1994).
- 49 Kay, R. F. & Meldrum, D. J. *A new small platyrrhine from the Miocene of Colombia and the phyletic position of Callitrichinae*. 435-458 (Smithsonian Institution Press, 1997).
- 50 Kay, R. F. Giant tamarin from the Miocene of Colombia. *Am. J. Phys. Anthropol.* **95**, 333-353 (1994).
- 51 Setoguchi, T. & Rosenberger, A. L. Miocene marmosets: First fossil evidence. *Int. J. Primatol.* **6**, 615-625 (1985).
- 52 Takai, M., Anaya, F., Suzuki, H., Shigehara, N. & Setoguchi, T. A new platyrrhine from the Middle Miocene of La Venta, Colombia, and the phyletic position of Callicebinae. *Anthropological Science* **109**, 289-307 (2001).
- 53 Kay, R. F. & Cozzuol, M. A. New platyrrhine monkeys from the Solimões formation (late Miocene, Acre State, Brazil). *J. Hum. Evol.* **50**, 673-686 (2006).
- 54 MacPhee, R. D., Iturralde-Vinent, M. & Gaffney, E. S. Domo de Zaza, an Early Miocene vertebrate locality in South-Central Cuba, with notes on the tectonic evolution of Puerto Rico and the Mona Passage 1. *American Museum Novitates*, no.3394 1-42 (2003).
- 55 Horovitz, I. & MacPhee, R. D. The quaternary Cuban platyrrhine *Paralouatta varonaia* and the origin of Antillean monkeys. *J. Hum. Evol.* **36**, 33-68 (1999).
- 56 MacPhee, R. D. & Meldrum, J. Postcranial Remains of the Extinct Monkeys of the Greater Antilles, with Evidence for Semiterrestriality in *Paralouatta* 1. *American Museum Novitates*, no. 3516, 1-65 (2006).
- 57 Rosenberger, A. *Xenothrix* and ceboid phylogeny. *J. Hum. Evol.* **6**, 461-481 (1977).
- 58 MacPhee, R. D. & Horovitz, I. New Craniodental Remains of the Quaternary Jamaican Monkey *Xenothrix mcgregori* (Xenotrichini, Callicebinae, Pitheciidae), with a Reconsideration of the Aotus Hypothesis 1. *American Museum Novitates*, 1-51 (2004).
- 59 MacPhee, R. D., Horovitz, I., Arredondo, O. & Vasquez, O. J. A new genus for the extinct Hispaniolan monkey *Saimiri bernensis* Rímoli, 1977: with notes on its systematic position. *American Museum Novitates*, no. 3134, 1-21. (1995).
- 60 Rosenberger, A. L., Cooke, S. B., Rímoli, R., Ni, X. & Cardoso, L. First skull of *Antillothrix bernensis*, an extinct relict monkey from the Dominican Republic. *Proceedings of the Royal Society of London B: Biological Sciences* **278**, 67-74 (2011).



- 61 Kay, R. F. *et al.* Preliminary notes on a newly discovered skull of the extinct monkey *Antillothrix* from Hispaniola and the origin of the Greater Antillean monkeys. *J. Hum. Evol.* **60**, 124-128 (2011).
- 62 Rosenberger, A. L., Klukkert, Z. S., Cooke, S. B. & Rímoli, R. Rethinking *Antillothrix*: The mandible and its implications. *Am. J. Primatol.* **75**, 825-836 (2013).
- 63 Wilson, D. E. & Reeder, D. M. *Mammal species of the world: a taxonomic and geographic reference*. Vol. 12 (Johns Hopkins University Press, 2005).
- 64 Groves, C. *Primate Taxonomy* (Smithsonian Institution, Washington, DC, 2001).
- 65 Swofford, D. PAUP\* version 4.0. *Phylogenetic Analysis Using Parsimony (and Other Methods)* (2002).
- 66 Stamatakis, A. RAxML-VI-HPC: maximum likelihood-based phylogenetic analyses with thousands of taxa and mixed models. *Bioinformatics* **22**, 2688-2690 (2006).
- 67 Drummond, A. J., Suchard, M. A., Xie, D. & Rambaut, A. Bayesian phylogenetics with BEAUti and the BEAST 1.7. *Mol. Biol. Evol.* **29**, 1969-1973 (2012).
- 68 Yule, G. U. A mathematical theory of evolution, based on the conclusions of Dr. JC Willis, FRS. *Philosophical Transactions of the Royal Society of London. Series B, Containing Papers of a Biological Character*, 21-87 (1925).
- 69 Gernhard, T. The conditioned reconstructed process. *J. Theor. Biol.* **253**, 769-778 (2008).
- 70 Ayres, D. L. *et al.* BEAGLE: an application programming interface and high-performance computing library for statistical phylogenetics. *Syst. Biol.*, **61**, 170-173 (2012).
- 71 Meredith, R. W. *et al.* Impacts of the Cretaceous Terrestrial Revolution and KPg extinction on mammal diversification. *Science* **334**, 521-524 (2011).
- 72 Mann, P. & Kolarsky, R. A. in *Geologic and Tectonic Development of the Caribbean Plate Boundary in Southern Central America* Vol. 295 *Geological Society of America Special Paper* (ed P. Mann) 111-130 (Geological Society of America, 1995).
- 73 Recchi, G. & Metti, A. in *Atlas Nacional de Panama* (ed J.C. Molo) 71 (Instituto Tommy Guardia, 1975).
- 74 Silver, E. A., Galewsky, J. & McIntosh, K. D. Variation in structure, style, and driving mechanism of adjoining segments of the North Panama deformed belt. *Spec. Pap. Geol. Soc. Am.* **295**, 225-233 (1995).
- 75 Silver, E. A., Reed, D. L., Tagudin, J. E. & Heil, D. J. Implications of the north and south Panama thrust belts for the origin of the Panama orocline. *Tectonics* **9**, 261-281 (1990).
- 76 Lowrie, A., Stewart, J. L., Stewart, R. H., Van Andel, T. J. & McRaney, L. Location of the eastern boundary of the Cocos plate during the Miocene. *Mar. Geol.* **45**, 261-279 (1982).
- 77 Woodring, W. P. Geology and description of Tertiary mollusks (gastropods; trochidae to Turritellidae). Geology and paleontology of Canal Zone and adjoining parts of Panama. *U S Geological Survey Professional Paper* **306-A**, 145 (1957).

- 78 Duque-Caro, H. Neogene stratigraphy, paleoceanography and paleobiogeography in northwest South America and the evolution of the Panama Seaway. *Palaeogeogr., Palaeoclimatol., Palaeoecol.* **77**, 203-234 (1990).
- 79 Mann, P. & Corrigan, J. Model for Late Neogene Deformation in Panama. *Geology* **18**, 558-562 (1990).
- 80 Cediel, F., Shaw, R. P. & Caceres, C. Tectonic assembly of the northern Andean Block. *AAPG Mem.* **79**, 815-848 (2003).
- 81 Montes, C. *et al.* Clockwise rotation of the Santa Marta massif and simultaneous Paleogene to Neogene deformation of the Plato-San Jorge and Cesar-Rancheria basins. *J. S. Am. Earth. Sci.* **29**, 832-848, doi:10.1016/j.jsames.2009.07.010 (2010).
- 82 Montes, C., Hatcher, R. D. & Restrepo-Pace, P. A. Tectonic reconstruction of the northern Andean blocks: Oblique convergence and rotations derived from the kinematics of the Piedras-Girardot area, Colombia. *Tectonophysics* **399**, 221-250, doi:10.1016/j.tecto.2004.12.024 (2005).
- 83 Cediel, F., Shaw Robert, P. & Caceres, C. Tectonic assembly of the northern Andean Block. *AAPG Memoir* **79**, 815-848 (2003).
- 84 Pindell, J. L. & Kennan, L. in *The origin and evolution of the Caribbean Plate* Vol. 328 (eds Keith H. James, Maria A. Lorente, & J. L. Pindell) 1-55 (Geological Society, 2009).
- 85 Escalona, A. & Mann, P. Tectonics, basin subsidence mechanisms, and paleogeography of the Caribbean-South American plate boundary zone. *Mar. Pet. Geol.*, 1-32 (2010).
- 86 Lonsdale, P. Creation of the Cocos and Nazca plates by fission of the Farallon plate. *Tectonophysics* **404**, 237-264 (2005).
- 87 Meschede, M. & Frisch, W. A plate-tectonic model for the Mesozoic and Early Cenozoic history of the Caribbean plate. *Tectonophysics* **296**, 269-291 (1998).
- 88 Stearns, C., Mauk, F. J. & van der Voo, R. Late Cretaceous-early Tertiary paleomagnetism of Aruba and Bonaire (Netherlands Leeward Antilles). *Journal of Geophysical Research* **87**, 1127-1141 (1982).
- 89 Acton, G. D., Galbrun, B. & King, J. W. in *Proceedings of the Ocean Drilling Program, Scientific Results* Vol. 165 (eds R. Mark Leckie, Haraldur Sigurdsson, D. Acton Gary, & G. Draper) 149-173 (2000).
- 90 Buchs, D. M., Arculus, R. J., Baumgartner, P. O., Baumgartner-Mora, C. & Ulianov, A. Late Cretaceous arc development on the SW margin of the Caribbean Plate: insights from the Golfito (Costa Rica) and Azuero (Panama) complexes. *Geochem Geophys Geosy* **11**, 35 pp, doi:doi:10.1029/2009GC002901 (2010).
- 91 Frisch, W., Meschede, M. & Sick, M. Origin of the Central American ophiolites: Evidence from paleomagnetic results. *Geol Soc Am Bull* **104**, 1301-1314 (1992).
- 92 Opdyke, N. D., Kent, D. V., Huang, K., Foster, D. A. & Patel, J. P. Equatorial paleomagnetic time-averaged field results from 0-5 Ma lavas from Kenya and the latitudinal variation of angular dispersion. *Geochem. Geophys. Geosy.* **11**, Q05005, doi:10.1029/2009GC002863 (2010).
- 93 Cardona, A. *et al.* From arc-continent collision to continuous convergence, clues from Paleogene conglomerates along the southern Caribbean-South America plate boundary. *Tectonophysics* **580**, 58-87 (2012).

- 94 Borrero, C. *et al.* Tectonostratigraphy of the Cenozoic Tumaco forearc basin (Colombian Pacific) and its relationship with the northern Andes orogenic build up. *J. S. Am. Earth Sci.* **39**, 75-92 (2012).
- 95 Caicedo, J. & Roncancio, J. in *Estudios Geoloicos del Valle Superior del Magdalena*. (ed F. Etayo Serna) X (Ecopetrol, 1994).
- 96 Silva Tamayo, J., Sierra, G. & Correa, L. Tectonic and climate driven fluctuations in the stratigraphic base level of a Cenozoic continental coal basin, northwestern Andes. *J. S. Am. Earth Sci.* **26**, 369-382 (2008).
- 97 Duque-Caro, H. The Choco Block in the northwestern corner of South America; structural, tectonostratigraphic, and paleogeographic implications. *J. S. Am. Earth. Sci.* **3**, 71-84 (1990).
- 98 Shelton, B. J. *Geology and Petroleum Prospects of Darien, Southeastern Panama* Master of Science thesis, Oregon State College, (1952).
- 99 Buchs, D. M., Arculus, R. J., Baumgartner, P. O. & Ulianov, A. Oceanic intraplate volcanoes exposed: Example from seamounts accreted in Panama. *Geology* **39**, 335-338 (2011).
- 100 Coates, A. G., Collins, L. S., Aubry, M. P. & Berggren, W. A. The geology of the Darien, Panama, and the late Miocene-Pliocene collision of the Panama arc with northwestern South America. *Geol. Soc. Am. Bull.* **116**, 1327-1344, doi:10.1130/b25275.1 (2004).
- 101 Montes, C. *et al.* Evidence for middle Eocene and younger emergence in Central Panama: implications for Isthmus closure. *Geol. Soc. Am. Bull.* **124**, 780-799, doi:10.1130/B30528.1 (2012).
- 102 Flinch, J. F. in *The Circum-Gulf of Mexico and the Caribbean: Hydrocarbon habitats, basin formation, and plate tectonics* AAPG Memoir Vol. 79 (eds C. Bartolini, R. T. Buffler, & J. Blickwede) 776-796 (2003).
- 103 Rincon, D. *et al.* Eocene-Pliocene planktonic foraminifera biostratigraphy from the continental margin of the southwest Caribbean. *Stratigraphy* **4**, 261-311 (2007).
- 104 Tschanz, C. M., Marvin, R. F., Cruzb, J., Mehnert, H. H. & Cebula, G. T. Geologic Evolution of Sierra-Nevada-De-Santa-Marta, Northeastern Colombia. *Geol. Soc. Am. Bull.* **85**, 273-284 (1974).
- 105 Rollins, J. Stratigraphy and structure of the Guajira Peninsula, northwest Venezuela and northeast Colombia: Nebraska Univ. *Studies, new ser* (1965).
- 106 Diaz de Gamero, M. a. L. The changing course of the Orinoco River during the Neogene: a review. *Palaeogeography, Palaeoclimatology, Palaeoecology* **123**, 385-402 (1996).
- 107 Bruerer, J. W. Geological report CPMS-310 Paraiso-Maraure area (Central Falcon). 27 (Venezuelan Oil Concessions Ltd, London, 1949).
- 108 Gomez, E., Jordan, T. E., Allmendinger, R. W. & Cardozo, N. Development of the Colombian foreland-basin system as a consequence of diachronous exhumation of the northern Andes. *Geol. Soc. Am. Bull.* **117**, 1272-1292 (2005).
- 109 Saylor, J. E., Horton, B. K., Nie, J., Corredor, J. & Mora, A. Evaluating foreland basin partitioning in the northern Andes using Cenozoic fill of the Floresta basin, Eastern Cordillera, Colombia. *Basin Research*, 1-26 (2010).

- 110 Bayona, G. *et al.* Estratigrafía y procedencia de las rocas del Mioceno en la parte distal de la cuenca antepais de los Llanos de Colombia. Translated Title: Stratigraphy and provenance of Miocene rocks in distal Llanos foreland basin, Colombia. *Geologia Colombiana* **33**, 23-46 (2008).
- 111 Hoorn, C. *et al.* in *Amazonia, Landscape and Species Evolution: A Look into the Past* (eds C. Hoorn & F.P. Wesselingh) Ch. 7, 103-122 (Blackwell Publishing, 2010).
- 112 Gomez, E. *et al.* Controls on architecture of the Late Cretaceous to Cenozoic southern Middle Magdalena Valley Basin, Colombia. *Geol. Soc. Am. Bull.* **115**, 131-147 (2003).
- 113 Jarzen, D. M., Corbett, S. L. & Manchester, S. R. Palynology and paleoecology of the Middle Miocene Alum Bluff flora, Liberty County, Florida, USA. *Palynology* **34**, 261-286 (2010).
- 114 Graham, A. & Jarzen, D. M. Studies in neotropical paleobotany. I. The Oligocene communities of Puerto Rico. *Ann. Missouri Bot. Gard.*, 308-357 (1969).
- 115 Lenhardt, N., Herrmann, M. & Goetz, A. E. Palynomorph preservation in volcanoclastic rocks of the Miocene Tepoztlán formation (Central Mexico) and implications for paleoenvironmental reconstruction. *Palaios* **28**, 710-723 (2013).
- 116 Ramírez-Arriaga, E. *et al.* Palynological evidence for Middle Miocene vegetation in the Tehuacán Formation of Puebla, Mexico. *Palynology* **38**, 1-27 (2014).
- 117 Chávez, R. P. & Rzedowski, J. Estudio palinológico de las floras fósiles del Mioceno inferior y principios del Mioceno medio de la región de Pichucalco, Chiapas, México. *Acta Botánica Mexicana* **24**, 1-96 (1993).
- 118 Graham, A. *Late Cretaceous and Cenozoic history of Latin American vegetation and terrestrial environments*. (Missouri Botanical Garden Press, 2010).
- 119 Hernández, E. M. Caracterización ambiental del Terciario de la región de Ixtapa, Estado de Chiapas-un enfoque palinoestratigráfico. *Rev. Mex. Cienc. Geol.* **10**, 54-64 (1992).
- 120 Graham, A. Miocene communities and paleoenvironments of southern Costa Rica. *Am. J. Bot.*, 1501-1518 (1987).
- 121 Gentry, A. H. Neotropical floristic diversity: phytogeographical connections between Central and South America, Pleistocene climatic fluctuations, or an accident of the Andean orogeny? *Ann. Missouri Bot. Gard.*, 557-593 (1982).
- 122 Pratt, A. E. & Morgan, G. S. New Sciuridae (Mammalia: Rodentia) from the early Miocene Thomas Farm local fauna, Florida. *J. Vert. Paleontol.* **9**, 89-100 (1989).
- 123 Goodwin, H., Janis, C., Gunnell, G. & Uhen, M. Sciuridae. *Evolution of tertiary mammals of North America* **2**, 355-376 (2008).
- 124 Slaughter, B. H. A new genus of geomyoid rodent from the Miocene of Texas and Panama. *J. Vert. Paleontol.* **1**, 111-115 (1981).
- 125 Albright, L. B. Insectivores, rodents, and carnivores of the Toledo Bend Local Fauna: an Arikarean (Earliest Miocene) assemblage from the Texas coastal plain. *J. Vert. Paleontol.* **16**, 458-473 (1996).
- 126 Baskin, J. A. Chapter 6: New Procyonines from the Hemingfordian and Barstovian of the Gulf Coast and Nevada, Including the First Fossil Record of the Potosini. *Bull. Am. Mus. Nat. Hist.*, 125-146 (2003).

- 127 Wright, D. Tayassuidae; pp: 389-401. *Evolution of Tertiary mammals of North America*. Cambridge University Press, Cambridge (1998).
- 128 Albright, L. B. *Ungulates of the Toledo Bend local fauna (late Arikareean, early Miocene), Texas coastal plain*. (University of Florida, 1999).
- 129 Macdonald, J. R. & Schultz, C. B. *Arretotherium Fricki: A New Miocene Anthracothere from Nebraska*. (University of Nebraska, 1956).
- 130 David Webb, S., Beatty, B. L. & Poinar Jr, G. Chapter 14: New Evidence of Miocene Protoceratidae Including a New Species from Chiapas, Mexico. *Bull. Am. Mus. Nat. Hist.*, 348-367 (2003).
- 131 Stevens, M. S. Further study of Castolon Local Fauna (early Miocene) Big Bend National Park, Texas. *Pearce-Sellards Series Texas Memorial Museum* **28**, 1-69 (1977).
- 132 Honey, J. G., Harrison, J., Prothero, D. & Stevens, M. Camelidae. *Evolution of tertiary mammals of North America* **1**, 439-462 (1998).
- 133 Webb, S. D. 31 Hornless ruminants. *Evolution of Tertiary Mammals of North America: Terrestrial carnivores, ungulates, and ungulate-like mammals* **1**, 463 (1998).
- 134 MacFadden, B. J. Interpreting extinctions from the fossil record: methods, assumptions, and case examples using horses (Family Equidae). *Extinction and Phylogeny*. Columbia University Press, New York, 17-45 (1992).
- 135 Woodring, W. P. Geology and paleontology of Canal Zone and adjoining parts of Panama; description of Tertiary mollusks; pelecypods, Propeamussiidae to Cuspidariidae; additions to families covered in P 306-E; additions to gastropods; cephalopods. *U S Geological Survey Professional Paper* **306-7**, 541-759 (1982).
- 136 Gingerich, P. D., Smith, B. H. & Rosenberg, K. Allometric scaling in the dentition of primates and prediction of body weight from tooth size in fossils. *Am. J. Phys. Anthropol.* **58**, 81-100 (1982).
- 137 Harrison, T. The zoogeographic and phylogenetic relationships of early catarrhine primates in Asia. *Anthropological Science* **113**, 43-51, doi:10.1537/ase.04S006 (2005).
- 138 Harrison, T. & Yumin, G. Taxonomy and phylogenetic relationships of early Miocene catarrhines from Sihong, China. *J. Hum. Evol.* **37**, 225-277 (1999).
- 139 Raven, P. H. & Axelrod, D. I. Angiosperm Biogeography and Past Continental Movements. *Ann. Missouri Bot. Gard.* **61**, 539-673, doi:10.2307/2395021 (1974).
- 140 Kooyman, R. M. *et al.* Paleo-Antarctic rainforest into the modern Old World tropics: The rich past and threatened future of the “southern wet forest survivors”. *Am. J. Bot.* **101**, 2121-2135 (2014).
- 141 Van der Hammen, T. in *Woody plants—evolution and distribution since the Tertiary*, 109-114 (Springer, 1989).
- 142 Pennington, R. T. & Dick, C. W. The role of immigrants in the assembly of the South American rainforest tree flora. *Philosophical Transactions of the Royal Society B: Biological Sciences* **359**, 1611-1622 (2004).
- 143 Dick, C. W., Abdul-Salim, K. & Bermingham, E. Molecular systematic analysis reveals cryptic tertiary diversification of a widespread tropical rain forest tree. *The American Naturalist* **162**, 691-703 (2003).



- 144 Bardon, L. *et al.* Origin and evolution of Chrysobalanaceae: insights into the  
evolution of plants in the Neotropics. *Bot. J. Linn. Soc.* **171**, 19-37 (2013).
- 145 Carvalho, F. A. & Renner, S. S. A dated phylogeny of the papaya family  
(Caricaceae) reveals the crop's closest relatives and the family's biogeographic  
history. *Mol. Phylogen. Evol.* **65**, 46-53 (2012).
- 146 Doyle, J. A., Sauquet, H., Scharaschkin, T. & Le Thomas, A. Phylogeny,  
Molecular and Fossil Dating, and Biogeographic History of Annonaceae and  
Myristicaceae (Magnoliales). *Int. J. Plant Sci.* **165**, S55-S67 (2004).
- 147 Germeraad, J. H., Hopping, C. A. & Muller, J. Palynology of Tertiary sediments  
from tropical areas. *Rev. Palaeobot. Palynol.* **6**, 189-348 (1968).
- 148 Regali, M., Uesugui, N. & Santos, A. Palinologia dos sedimentos Meso-  
Cenozoicos do Brasil. *Bol. Tec. PETROBRAS* **17**, 177-191 (1974).
- 149 Givnish, T. J. & Renner, S. S. Tropical intercontinental disjunctions: Gondwana  
breakup, immigration from the boreotropics, and transoceanic dispersal. *Int. J.*  
*Plant Sci.* **165**, S1-S6 (2004).
- 150 Crisp, M. D. *et al.* Phylogenetic biome conservatism on a global scale. *Nature*  
**458**, 754-756 (2009).
- 151 Jaramillo, C. A. & Dilcher, D. L. Middle Paleogene palynology of central  
Colombia, South America; a study of pollen and spores from tropical latitudes.  
*Palaeontog. Abt. B Palaeophyt.* **258**, 4-6 (2001).
- 152 Wilf, P., Cúneo, N. R., Escapa, I. H., Pol, D. & Woodburne, M. O. Splendid and  
seldom isolated: the paleobiogeography of Patagonia. *Annual Review of Earth*  
*and Planetary Sciences* **41**, 561 (2013).
- 153 Palazzesi, L. & Barreda, V. Major vegetation trends in the Tertiary of Patagonia  
(Argentina): a qualitative paleoclimatic approach based on palynological  
evidence. *Flora-Morphology, Distribution, Functional Ecology of Plants* **202**,  
328-337 (2007).
- 154 Palazzesi, L. & Barreda, V. Fossil pollen records reveal a late rise of open-habitat  
ecosystems in Patagonia. *Nature communications* **3**, 1294 (2012).
